# Supplementary material
Source: publisher figshare collection journal article supplement (https://sage.figshare.com/ndownloader/files/15255077)
Supplement: Supplementary file 1 [file 15255077]

**Supplement**

1. In the subsequent revision of the paper, the title is changed from “Kinematic Error Analysis of Mine Bolter Manipulator with Uncertain Parameters” to “**Kinematics Uncertainty Analysis of Mine Bolter Manipulator Based on Chebyshev Interval Algorithms”** according to the actual content and structure of the article.

2. In the subsequent revisions, XiangdongYu3, GuoyingMeng4, LifengMa1, 2

contribute to the content and language of the article, and add XiangdongYu3, GuoyingMeng4, LifengMa1, 2 as co-authors.

(1.School of Mechanical Engineering, Taiyuan University of Science and Technology, Taiyuan 030024, China; 2. Collaborative Innovation Center of Taiyuan Heavy Machinery Equipment, Taiyuan 030024, China; 3. Taiyuan Institute of China Coal Technology Engineering Group, Taiyuan 03006, China4; 4.College of Mechanical and Electrical Engineering, China University of Mining and Technology ,Beijin100080, China)

XiangdongYu3:mkyyxd@163.com;

GuoyingMeng4:mgy@cumtb.edu.cn;

LifengMa1, 2:malifengfqh@163.com;
